# Supplementary material for: Is the risk of cervical atypia associated with the interval between menarche and the start of sexual activity? A population-based cohort study
Source: PubMed Central journal article supplement — BMJ Open. 2019 Sep 11;9(9):e030091. doi: 10.1136/bmjopen-2019-030091 (PMC6738745; doi:10.1136/bmjopen-2019-030091), 2019-09-11
Supplement: bmjopen-2019-030091supp001.pdf [file bmjopen-2019-030091supp001.pdf]

**Appendix.** Power to find an association ( $p=0.05$ ) for short interval between menarche and age at the start of sexual activity, and cervical atypia assuming up to 20% cumulative atypia incidence\* and variable strength (odds ratio, OR) of the association in 900 women.

| <b>OR</b> | <b>5%</b> | <b>10%</b> | <b>15%</b> | <b>20%</b> |
|-----------|-----------|------------|------------|------------|
| 0.5       | 0.22      | 0.49       | 0.72       | 0.87       |
| 2.0       | 0.64      | 0.90       | 0.98       | 1.00       |
| 4.0       | 1.00      | 1.00       | 1.00       | 1.00       |

\*prevalence at the end of follow up
